# Supplementary material for: Prognostic divergence of hematogenous and lymphatic metastases in patients with stage IV colorectal cancer
Source: Research Square preprint supplement (doi:10.21203/rs.3.rs-8690733/v1), 2026-02-13
Supplement: Supplementary file 1 [file 36c706c0623f230ec91a2bef.docx]

**Table 1.** Clinical characteristics and surgical outcomes of patient population before and after propensity score matching (PSM)

| **Parameters** | **Before PSM** | | |  | **After PSM** | | |
| --- | --- | --- | --- | --- | --- | --- | --- |
| **N0M1** | **N+M1** | ***P*-value** |  | **N0M1** | **N+M1** | ***P*-value** |
| Sex (n) | 109 | 384 |  |  | 87 | 87 |  |
| Female | 36 (33.0%) | 130 (33.9%) | NS |  | 31 (35.6%) | 30 (34.5%) | NS |
| Male | 73 (67.0%) | 254 (66.1%) |  |  | 56 (64.4%) | 57 (65.5%) |  |
| Age (years) |  |  |  |  |  |  |  |
| <70 | 56 (51.4%) | 214 (55.7%) | NS |  | 44 (50.6%) | 51 (58.6%) | NS |
| ≥70 | 53 (48.6%) | 170 (44.3%) |  |  | 43 (49.4%) | 36 (41.4%) |  |
| Family history of cancer |  |  |  |  |  |  |  |
| No | 42 (38.5%) | 163 (42.3%) | NS |  | 34 (39.1%) | 37 (42.5%) | NS |
| Yes | 67 (61.5%) | 221 (57.6%) |  |  | 53 (60.9%) | 50 (57.5%) |  |
| CEA (ng/ml) |  |  |  |  |  |  |  |
| <5 | 26 (23.9%) | 104 (27.1%) | NS |  | 20 (23.0%) | 25 (28.7%) | NS |
| ≥5 | 83 (76.1%) | 280 (72.9%) |  |  | 67 (77.0%) | 62 (71.3%) |  |
| Tumor location |  |  |  |  |  |  |  |
| Colon | 67 (61.5%) | 222 (58.7%) | NS |  | 56 (64.4%) | 49 (56.3%) | NS |
| Rectum | 42 (38.5%) | 162 (42.2%) |  |  | 31 (35.6%) | 38 (43.7%) |  |
| Tumor size (cm) |  |  |  |  |  |  |  |
| <5 | 55 (50.5%) | 215 (56.0%) | NS |  | 41 (47.1%) | 47 (54.0%) | NS |
| ≥5 | 54 (49.5%) | 169 (44.0%) |  |  | 46 (52.9%) | 40 (46.0%) |  |
| Histotype |  |  |  |  |  |  |  |
| Adenocarcinoma | 97 (89.0%) | 341(88.8%) |  |  | 76 (87.4%) | 80 (92.0%) |  |
| Sig, Muc | 12 (11.0%) | 43 (11.2%) | NS |  | 11 (12.6%) | 7 (8.0%) | NS |
| Differentiation |  |  |  |  |  |  |  |
| Well, Mod | 94 (86.2%) | 298 (77.6%) |  |  | 73 (83.9%) | 75 (86.2%) |  |
| Poor, Sig, Muc | 15 (13.8%) | 86 (22.4%) | NS |  | 14 (16.1%) | 12 (13.8%) | NS |
| T classification |  |  |  |  |  |  |  |
| T1-T2 | 6 (5.5%) | 12 (3.1%) |  |  | 3 (3.4%) | 2 (2.3%) |  |
| T3-T4 | 103 (94.5%) | 372 (96.9%) | NS |  | 84 (96.6%) | 85 (97.7%) | NS |
| N classification |  |  |  |  |  |  |  |
| N0-N1 | 114 (59.4%) | 205 (52.7%) |  |  | 83 (59.3%) | 79 (76.4%) |  |
| N2 | 78 (40.6%) | 184 (47.3%) | NS |  | 57 (40.7%) | 61 (43.6%) | NS |
| Lymphatic invasion |  |  |  |  |  |  |  |
| No | 73 (67.0%) | 150 (39.1%) | <0.001 |  | 56 (64.4%) | 56 (64.4%) | NS |
| Yes | 36 (33.0%) | 234 (60.9%) |  |  | 31 (35.6%) | 931 (35.6%) |  |
| Venous invasion |  |  |  |  |  |  |  |
| No | 22 (20.2%) | 39 (10.2%) | 0.008 |  | 13 (14.9%) | 13 (14.9%) | NS |
| Yes | 87 (78.0%) | 345 (89.8%) |  |  | 74 (85.1%) | 74 (85.1%) |  |
| Liver metastasis |  |  |  |  |  |  |  |
| No | 24 (22.0%) | 88 (22.9%) | NS |  | 17 (19.5%) | 20 (23.0%) | NS |
| Yes | 85 (78.0%) | 296 (77.1%) |  |  | 70 (80.5%) | 67 (42.3%) |  |
| Lung metastasis |  |  |  |  |  |  |  |
| No | 76 (69.7%) | 262 (68.2%) | NS |  | 65 (74.7%) | 59 (67.8%) | NS |
| Yes | 33 (30.3%) | 122 (31.8%) |  |  | 22 (25.3%) | 28 (32.2%) |  |
| Bone metastasis |  |  |  |  |  |  |  |
| No | 107 (98.2%) | 375 (97.7%) | NS |  | 85 (97.7%) | 85 (97.7%) | NS |
| Yes | 2 (1.8%) | 9 (2.3%) |  |  | 2 (2.3%) | 2 (2.3%) |  |
| Hospital stay (days)  Mean±SD | 15.1±9.0 | 10.3±8.0 | 0.03 |  | 10.8±8.0 | 9.83±7.0 | NS |
| Postoperative complications |  |  |  |  |  |  |  |
| No | 74 (67.9%) | 295 (76.8%) | 0.076 |  | 67 (77.0%) | 64 (73.6%) | NS |
| Yes | 35 (32.1%) | 89 (23.2%) |  |  | 20 (23.0%) | 23 (26.4%) |  |
| Adjuvant chemotherapy |  |  |  |  |  |  |  |
| No/unknown | 68 (62.4%) | 241 (62.8%) | NS |  | 58 (66.7%) | 53 (60.9%) | NS |
| Yes | 41 (37.6%) | 143 (37.2%) |  |  | 29 (33.3%) | 34 (39.1%) |  |

CEA, carcinoembryonic antigen; Well, well differentiated; Mod, moderately differentiated; Poor, poorly differentiated; Muc, mucinous carcinoma; Sig, signet ring cell carcinoma; SD, standard deviation; NS, not significant.

**Table 2.** Multivariate logistic regression analysis of overall survival (OS) before and after propensity score matching (PSM)

| **Variable** | **OS Before PSM** | | |  | **OS After PSM** | | |
| --- | --- | --- | --- | --- | --- | --- | --- |
| **HR** | **(95% Cl)** | ***P*-value** |  | **HR** | **(95% Cl)** | ***P*-value** |
| LNM+ vs LNM- | 1.5 | (1.09-2.08) | 0.014 |  | 1.72 | (1.121-2.64) | 0.013 |
| Colon vs rectum | 0.81 | (0.62-1.06) | NS |  | 0.64 | (0.404-1.03) | NS |
| Age (years) <70 vs ≥70 | 1.26 | (0.98-1.64) | NS |  | 1.05 | (0.677-1.61) | NS |
| Tumor family history, yes vs no | 0.93 | (0.71-1.20) | NS |  | 0.83 | (0.539-1.28) | NS |
| Postoperative complications, yes vs no | 1.3 | (0.98-1.73) | NS |  | 1.13 | (0.704-1.83) | NS |
| CEA (ng/ml), <5 vs ≥5 | 1.37 | (1.03-1.84) | 0.033 |  | 1.29 | (0.756-2.19) | NS |
| Tumor size (cm), <5 vs ≥5 | 1.03 | (0.79-1.33) | NS |  | 0.99 | (0.648-1.51) | NS |
| T classification, 1-2 vs 3-4 | 1.37 | (0.63-2.94) | NS |  | 4.16 | (0.553-31.37) | NS |
| Histotype, AdenoCA vs Muc, Sig | 0.54 | (0.32-0.94) | 0.03 |  | 0.31 | (0.099-0.95) | 0.04 |
| Liver metastasis, yes vs no | 1.54 | (1.02-2.32) | 0.041 |  | 0.95 | (0.429-2.11) | NS |
| Lung metastasis, yes vs no | 1.63 | (1.16-2.29) | 0.005 |  | 1.23 | (0.624-2.43) | 0.54 |
| Differentiation, Well/Mod vs Poor/Muc/Sig | 0.45 | (0.30-0.67) | <0.001 |  | 0.19 | (0.076-0.47) | <0.001 |
| Chemotherapy, yes vs no | 0.53 | (0.40-0.71) | <0.001 |  | 0.49 | (0.306-0.79) | 0.004 |

LNM, lymph node metastasis; CEA, carcinoembryonic antigen; Well, well differentiated; Mod, moderately differentiated; Poor, poorly differentiated; AdenoCA, adenocarcinoma; Muc, mucinous carcinoma; Sig, signet ring cell carcinoma; NS, not significant.

**Table 3.** Multivariate logistic regression analysis of cancer-specific survival (CSS) before and after propensity score matching (PSM)

| **Variable** | **CSS before PSM** | | |  | **CSS after PSM** | | |
| --- | --- | --- | --- | --- | --- | --- | --- |
| **HR** | **(95% Cl)** | ***P*-value** |  | **HR** | **(95% Cl)** | ***P*-value** |
| LNM + vs. LNM- | 1.6 | (1.13-2.25) | 0.007 |  | 1.86 | (1.185-2.90) | 0.007 |
| Colon vs rectum | 0.78 | (0.59-1.03) | NS |  | 0.61 | (0.374-1.00) | NS |
| Age (years) <70 vs ≥70 | 1.19 | (0.91-1.56) | NS |  | 1.04 | (0.569-1.63) | NS |
| Family history of tumor, yes vs no | 0.94 | (0.72-1.23) | NS |  | 0.86 | (0.546-1.34) | NS |
| Postoperative complications, yes vs no | 1.16 | (0.86-1.57) | NS |  | 1.13 | (0.690-1.86) | NS |
| CEA (ng/ml), <5 vs ≥5 | 1.40 | (1.04-1.90) | 0.028 |  | 1.32 | (0.756-2.32) | NS |
| Tumor size (cm), <5 vs ≥5 | 0.97 | (0.75-1.27) | NS |  | 0.91 | (0.587-1.42) | NS |
| T classification, 1-2 vs 3-4 | 1.24 | (0.57-2.66) | NS |  | 3.88 | (0.514-29.35) | NS |
| Histotype, AdenoCA vs Muc, Sig | 0.54 | (0.31-0.94) | 0.029 |  | 0.24 | (0.074-0.79) | 0.018 |
| Liver metastasis, yes vs no | 1.62 | (1.06-2.46) | 0.024 |  | 0.97 | (0.43-2.17) | NS |
| Lung metastasis, yes vs no | 1.78 | (1.26-2.52) | 0.001 |  | 1.30 | (0.655-2.59) | NS |
| Differentiation, Well/Mod vs Poor/Muc/Sig | 0.43 | (0.29-0.64) | <0.001 |  | 0.16 | (0.063-0.40) | <0.001 |
| Chemotherapy, yes vs no | 0.57 | (0.43-0.77) | <0.001 |  | 0.53 | (0.327-0.87) | 0.013 |

LNM, lymph node metastasis; CEA, carcinoembryonic antigen; Well, well differentiated; Mod, moderately differentiated; Poor, poorly differentiated; AdenoCA, adenocarcinoma; Muc, mucinous carcinoma; Sig, signet ring cell carcinoma; NS, not significant.
